# Supplementary material for: The Hymenopterous Parasitoids of the Lime Leaf Miner Phyllonorycter issikii (Kumata) (Lepidoptera: Gracillariidae) from Its Native and Invaded Regions in Asian Russia
Source: MDPI journal article supplement (doi:10.3390/d14090707), 2022-08-26
Supplement: s1 [file s1]

The hymenopterous parasitoids of the lime leaf miner *Phyllonorycter issikii* (Kumata) (Lepidoptera: Gracillariidae) from its native and invaded regions in Asian Russia

AUTHORS: Oksana V. Kosheleva, Sergey A. Belokobylskij, Natalia I. Kirichenko

**Table S2.** The checklist of *Phyllonorycter issikii* parasitoids in the Palearctic.

| No.                           | Species                                                     | Locality                                                                                                          | Reference                                                          |
|-------------------------------|-------------------------------------------------------------|-------------------------------------------------------------------------------------------------------------------|--------------------------------------------------------------------|
| <b>EULOPHIDAE: Eulophinae</b> |                                                             |                                                                                                                   |                                                                    |
| 1                             | <i>Cirrospilus diallus</i><br>Walker, 1838                  | Russia: Ulyanovsk Province<br>Russia: Udmurtia Republic                                                           | [15–17,19,28]<br>[21,22]                                           |
| 2                             | <i>C. elegantissimus</i><br>Westwood, 1832                  | Hungary<br>Ukraine: Kiew<br>Russia: Ulyanovsk Province                                                            | [29]<br>[10]<br>[17,19,28]                                         |
| 3                             | <i>Cirrospilus lyncus</i><br>Walker, 1838                   | Hungary<br>Slovakia<br>Russia: Udmurtia Republic<br>Russia: Ulyanovsk Province<br>Russia: Tyumen                  | [29]<br>[25]<br>[21,22]<br>[15–17,19,28]<br>[23]                   |
| 4                             | <i>Cirrospilus pictus</i><br>(Nees, 1834)                   | Slovakia<br>Ukraine: Kiew<br>Russia: Moscow Province<br>Russia: Udmurtia Republic<br>Russia: Tyumen               | [25]<br>[10]<br>[23]<br>[21,22]<br>[23]                            |
| 5                             | <i>Cirrospilus viticola</i><br>(Rondani, 1877)              | Hungary<br>Russia: Ulyanovsk Province                                                                             | [29]<br>[15–17,19,28]                                              |
| 6                             | <i>Cirrospilus vittatus</i><br>Walker, 1838                 | Slovakia<br>Russia: Udmurtia Republic                                                                             | [25]<br>[21,22]                                                    |
| 7                             | <i>Cirrospilus ussuriensis</i><br>Kosheleva, sp. nov.       | Russia: Primorsky Territory                                                                                       | <b>Kosheleva et al.<br/>(present study)</b>                        |
| 8                             | <i>Cirrospilus</i> sp.                                      | Japan: Hokkaido                                                                                                   | [15]                                                               |
| 9                             | <i>Dicladocerus</i><br><i>westwoodii</i> Westwood,<br>1832  | Russia: Udmurtia Republic                                                                                         | [21,22]                                                            |
| 10                            | <i>Diglyphus pusztensis</i><br>(Erdős and Novicky,<br>1951) | Slovakia                                                                                                          | [25]                                                               |
| 11                            | <i>Elachertus fenestratus</i><br>Nees, 1834                 | Hungary<br>Russia: Udmurtia Republic<br>Russia: Novosibirsk Province                                              | [29]<br>[21,22]<br><b>Kosheleva et al.<br/>(present study)</b>     |
| 12                            | <i>E. inunctus</i> Nees, 1834                               | Japan: Hokkaido<br>Slovakia<br>Russia: Ulyanovsk Province<br>Russia: Novosibirsk Province, Primorsky<br>Territory | [9]<br>[25]<br>[28]<br><b>Kosheleva et al.<br/>(present study)</b> |
| 13                            | <i>Elachertus</i> sp.                                       | Ukraine: Kharkov Province<br>Japan: Hokkaido                                                                      | [24, 26]<br>[9]                                                    |

| No. | Species                                                         | Locality                                                                                                                                                                    | Reference                                                                                                      |
|-----|-----------------------------------------------------------------|-----------------------------------------------------------------------------------------------------------------------------------------------------------------------------|----------------------------------------------------------------------------------------------------------------|
| 14  | <i>Hyssopus geniculatus</i><br>(Hartig, 1838)                   | Russia: Moscow Province<br>Russia: Nizhny Novgorod<br>Russia: Udmurtia Republic<br>Russia: Tatarstan Republic, Kazan<br>Russia: Ulyanovsk Province<br>Russia: Yekaterinburg | [27,24,23]<br>[23]<br>[21,22]<br>[23]<br>[15–17,19,28]<br>[23]                                                 |
| 15  | <i>Hyssopus nigritulus</i><br>(Zetterstedt, 1838)               | Russia: Tyumen<br>Russia: Udmurtia Republic                                                                                                                                 | [23]<br>[21,22]                                                                                                |
| 16  | <i>Pnigalio agraules</i><br>(Walker, 1839)                      | Hungary<br>Russia: Moscow Province                                                                                                                                          | [29]<br>[27,24,23]                                                                                             |
| 17  | <i>Pnigalio cristatus</i><br>(Ratzeburg, 1848)                  | Russia: Ulyanovsk Province                                                                                                                                                  | [28]                                                                                                           |
| 18  | <i>Pnigalio gyamiensis</i><br>Myartseva and<br>Kurashev, 1990   | Russia: Ulyanovsk Province                                                                                                                                                  | [28]                                                                                                           |
| 19  | <i>Pnigalio incompletus</i><br>(Bouček, 1971)                   | Bulgaria                                                                                                                                                                    | [30]                                                                                                           |
| 20  | <i>Pnigalio longulus</i><br>(Zetterstedt, 1838)                 | Slovakia                                                                                                                                                                    | [25]                                                                                                           |
| 21  | <i>Pnigalio mediterraneus</i><br>Ferriere and Delucchi,<br>1957 | Ukraine: Kharkov Province                                                                                                                                                   | [24,26]                                                                                                        |
| 22  | <i>Pnigalio nemati</i><br>(Westwood, 1838)                      | Udmurtia Republic                                                                                                                                                           | [21,22]                                                                                                        |
| 23  | <i>Pnigalio pectinicornis</i><br>(Linnaeus, 1758)               | Hungary<br>Russia: Udmurtia Republic<br>Russia: Tatarstan Republic, Kazan<br>Russia: Yekaterinburg<br>Russia: Tyumen<br>Russia: Novosibirsk Province                        | [29]<br>[21]<br>[23]<br>[23]<br>[23]<br><b>Kosheleva et al.<br/>(present study)</b>                            |
| 24  | <i>Pnigalio soemius</i><br>(Walker, 1839)                       | Hungary<br>Slovakia<br>Ukraine: Kharkov Province<br>Russia: Moscow Province<br><br>Russia: Udmurtia Republic<br>Russia: Ulyanovsk Province<br>Russia: Novosibirsk Province  | [29]<br>[25]<br>[24,26]<br>[23]<br><br>[21,22]<br>[15–17,19,28]<br><b>Kosheleva et al.<br/>(present study)</b> |
| 25  | <i>Pnigalio</i> sp.                                             | Ukraine: Kharkov Province<br>Russia: Moscow Province<br>Russia: Novosibirsk Province                                                                                        | [24,26]<br>[11,24]<br>[5,6]                                                                                    |
| 26  | <i>Pnigalio</i> sp. 1                                           | Russia: Novosibirsk Province                                                                                                                                                | <b>Kosheleva et al.<br/>(present study)</b>                                                                    |
| 27  | <i>Sympiesis acalle</i><br>(Walker, 1848)                       | Bulgaria                                                                                                                                                                    | [30]                                                                                                           |
| 28  | <i>Sympiesis angustipennis</i> (Erdős,<br>1954)                 | Hungary                                                                                                                                                                     | [29]                                                                                                           |
| 29  | <i>Sympiesis dolichogaster</i>                                  | Hungary<br>Slovakia                                                                                                                                                         | [29]<br>[25]                                                                                                   |

| No.                            | Species                                                     | Locality                                                                                                                                                                                                                                                                                                     | Reference                                                                                                                                    |
|--------------------------------|-------------------------------------------------------------|--------------------------------------------------------------------------------------------------------------------------------------------------------------------------------------------------------------------------------------------------------------------------------------------------------------|----------------------------------------------------------------------------------------------------------------------------------------------|
| 30                             | Ashmead, 1888<br><i>Sympiesis gordius</i><br>(Walker, 1848) | Russia: Udmurtia Republic<br>Bulgaria<br>Hungary<br>Slovakia<br>Ukraine: Kiew<br>Ukraine: Kharkov Province<br>Russia: Moscow Province<br>Russia: Udmurtia Republic<br>Russia: Tatarstan Republic, Kazan<br>Russia: Ulyanovsk Province<br>Russia: Tyumen<br>Russia: Novosibirsk Province, Primorsky Territory | [21]<br>[30]<br>[29]<br>[25]<br>[10]<br>[24,26]<br>[23]<br>[21,22]<br>[23]<br>[15–17,19,28]<br>23<br><b>Kosheleva et al. (present study)</b> |
| 31                             | <i>Sympiesis laevifrons</i><br>Kamijo, 1965                 | Russia: Primorskiy Territory                                                                                                                                                                                                                                                                                 | [12]; <b>Kosheleva et al. (present study)</b>                                                                                                |
| 32                             | <i>Sympiesis sericeicornis</i><br>(Nees, 1834)              | Japan: Hokkaido<br>Croatia<br>Bulgaria<br>Hungary<br>Slovakia<br>Ukraine: Kiew<br>Ukraine: Kharkov Province<br>Russia: Moscow Province<br>Russia: Nizhny Novgorod<br>Russia: Udmurtia Republic<br>Russia: Ulyanovsk Province<br>Russia: Yekaterinburg<br>Russia: Tyumen<br>Japan: Hokkaido                   | [31]<br>[13,29]<br>[30]<br>[29]<br>[25]<br>[10]<br>[24,26]<br>[23]<br>[23]<br>[21,22]<br>[15–17,19,28]<br>[23]<br>[23]<br>[31]               |
| 33                             | <i>Sympiesis</i> sp.                                        | Russia: Moscow Province                                                                                                                                                                                                                                                                                      | [11,24]                                                                                                                                      |
| <b>EULOPHIDAE: Entedoninae</b> |                                                             |                                                                                                                                                                                                                                                                                                              |                                                                                                                                              |
| 34                             | <i>Achrysocharoides altilis</i> (Delucchi, 1954)            | Russia: Nizhny Novgorod                                                                                                                                                                                                                                                                                      | [23]                                                                                                                                         |
| 35                             | <i>Achrysocharoides cilla</i><br>(Walker, 1839)             | Hungary<br>Russia: Primorskiy Territory                                                                                                                                                                                                                                                                      | [29]<br><b>Kosheleva et al. (present study)</b>                                                                                              |
| 36                             | <i>Achrysocharoides nagasawi</i> Kosheleva, sp. nov.        | Russia: Primorskiy Territory                                                                                                                                                                                                                                                                                 | <b>Kosheleva et al. (present study)</b>                                                                                                      |
| 37                             | <i>Achrysocharoides carinatus</i> Kosheleva, sp. nov.       | Russia: Primorskiy Territory                                                                                                                                                                                                                                                                                 | <b>Kosheleva et al. (present study)</b>                                                                                                      |
| 38                             | <i>Achrysocharoides</i> sp.                                 | Russia: Tyumen<br>Ukraine: Kharkov Province<br>Japan                                                                                                                                                                                                                                                         | [23]<br>[24,26]<br>[9]                                                                                                                       |
| 39                             | <i>Chrysocharis laomedon</i><br>(Walker, 1839)              | Bulgaria<br>Hungary<br>Ukraine: Kiew<br>Russia: Moscow Province<br>Russia: Nizhny Novgorod<br>Russia: Udmurtia Republic<br>Russia: Ulyanovsk Province<br>Russia: Yekaterinburg                                                                                                                               | [30]<br>[29]<br>[10]<br>[27,23,24]<br>[23]<br>[21,22]<br>[15–17,19,28]<br>[23]                                                               |

| No.                               | Species                                            | Locality                           | Reference               |
|-----------------------------------|----------------------------------------------------|------------------------------------|-------------------------|
|                                   |                                                    | Russia: Tyumen                     | [23]                    |
|                                   |                                                    | Russia: Novosibirsk Province,      | <b>Kosheleva et al.</b> |
|                                   |                                                    | Primorskiy Territory               | <b>(present study)</b>  |
|                                   |                                                    | Japan: Hokkaido                    | [35]                    |
| 40                                | <i>Chrysocharis nephereus</i> (Walker, 1839)       | Slovakia                           | [25]                    |
|                                   |                                                    | Russia: Moscow Province            | [23]                    |
|                                   |                                                    | Russia: Udmurtia Republic          | [21,22]                 |
|                                   |                                                    | Russia: Kazan (Tatarstan Republic) | [23]                    |
|                                   |                                                    | Russia: Yekaterinburg              | [23]                    |
|                                   |                                                    | Russia: Tyumen                     | [23]                    |
| 41                                | <i>Chrysocharis pentheus</i> (Walker, 1839)        | Bulgaria                           | [30]                    |
| 42                                | <i>Chrysocharis phryne</i> (Walker, 1839)          | Slovakia                           | [25]                    |
|                                   |                                                    | Russia: Udmurtia Republic          | [21,22]                 |
| 43                                | <i>Chrysocharis pubicornis</i> (Zetterstedt, 1838) | Slovakia                           | [25]                    |
|                                   |                                                    | Russia: Udmurtia Republic          | [21,22]                 |
|                                   |                                                    | Russia: Ulyanovsk Province         | [15–17,19,28]           |
| 44                                | <i>Chrysocharis ujiyei</i> Kamijo, 1977            | Japan: Hokkaido                    | [9]                     |
| 45                                | <i>Chrysocharis</i> sp.                            | Russia: Moscow Province            | 11,24                   |
|                                   |                                                    | Russia: Tyumen                     | [23]                    |
|                                   |                                                    | Russia: Novosibirsk Province       | [5,6]                   |
|                                   |                                                    | Japan: Hokkaido                    | [9]                     |
| 46                                | <i>Entedon</i> sp.                                 | Slovakia                           | [25]                    |
|                                   |                                                    | Russia: Ulyanovsk Province         | [15,17]                 |
| 47                                | <i>Neochrysocharis cuprifrons</i> Erdos, 1954      | Russia: Udmurtia Republic          | [21,22]                 |
| 48                                | <i>Neochrysocharis formosus</i> (Westwood, 1833)   | Hungary                            | [29]                    |
|                                   |                                                    | Russia: Udmurtia Republic          | [21,22]                 |
| 49                                | <i>Omphale versicolor</i> (Nees, 1834)             | Hungary                            | [24,25]                 |
| 50                                | <i>Omphale</i> sp.                                 | Russia: Tatarstan Republic, Kazan  | [23]                    |
| 51                                | <i>Pediobius cassidae</i> Erdos, 1958              | Russia: Ulyanovsk Province         | [17,19;28]              |
|                                   |                                                    | Russia: Primorskiy Territory       | <b>Kosheleva et al.</b> |
|                                   |                                                    |                                    | <b>(present study)</b>  |
| 52                                | <i>Pediobius metallicus</i> (Nees, 1834)           | Slovakia                           | [25]                    |
|                                   |                                                    | Russia: Ulyanovsk Province         | [17,19;28]              |
| 53                                | <i>Pediobius saulius</i> (Walker, 1839)            | Bulgaria                           | [30]                    |
|                                   |                                                    | Hungary                            | [29]                    |
|                                   |                                                    | Slovakia                           | [25]                    |
|                                   |                                                    | Ukraine: Kharkov Province          | [24,26]                 |
|                                   |                                                    | Russia: Udmurtia Republic          | [22]                    |
|                                   |                                                    | Japan: Hokkaido                    | [33]                    |
| 54                                | <i>Pleurotroppopsis japonica</i> (Kamijo, 1977)    | Japan:Hokkaido                     | [32]                    |
|                                   |                                                    | Russia: Primorsky Territory        | <b>Kosheleva et al.</b> |
|                                   |                                                    |                                    | <b>(present study)</b>  |
| <b>EULOPHIDAE: Tetrastichinae</b> |                                                    |                                    |                         |
| 55                                | <i>Aprostocetus zoilus</i> (Walker, 1839)          | Hungary                            | [29]                    |
|                                   |                                                    | Russia: Ulyanovsk Province         | [14]                    |
| 56                                | <i>Aprostocetus</i> sp.                            | Bulgaria                           | [30]                    |
|                                   |                                                    | Russia: Ulyanovsk Province         | [15–17,19]              |

| No.                  | Species                                               | Locality                          | Reference                               |
|----------------------|-------------------------------------------------------|-----------------------------------|-----------------------------------------|
| 57                   | <i>Baryscapus nigroviolaceus</i> (Nees, 1834)         | Slovakia                          | [25]                                    |
| 58                   | <i>Minotetrastichus frontalis</i> (Nees, 1834)        | Bulgaria                          | [20]                                    |
|                      |                                                       | Hungary                           | [29]                                    |
|                      |                                                       | Slovakia                          | [25]                                    |
|                      |                                                       | Ukraine: Kiev                     | [10]                                    |
|                      |                                                       | Ukraine: Kharkov Province         | [24,26]                                 |
|                      |                                                       | Russia: Nizhny Novgorod           | [23]                                    |
|                      |                                                       | Russia: Tatarstan Republic, Kazan | [23]                                    |
|                      |                                                       | Russia: Udmurtia Republic         | [21,22]                                 |
|                      |                                                       | Russia: Ulyanovsk Province        | [14,15,17–19,28]                        |
|                      |                                                       | Russia: Yekaterinburg             | [23]                                    |
|                      |                                                       | Russia: Tyumen                    | [23]                                    |
|                      |                                                       | Russia: Novosibirsk Province      | <b>Kosheleva et al. (present study)</b> |
| 59                   | <i>Mischotetrastichus nadezhdae</i> (Kostjukov, 1977) | Russia: Primorskiy Territory      | <b>Kosheleva et al. (present study)</b> |
| 60                   | <i>Minotetrastichus platanellus</i> (Mercet, 1922)    | Bulgaria                          | [30]                                    |
| 61                   | <i>Mischotetrastichus petiolatus</i> (Erdos, 1961)    | Slovakia                          | [25]                                    |
|                      |                                                       | Russia: Moscow Province           | [24,27]                                 |
|                      |                                                       | Russia: Udmurtia Republic         | [21,22]                                 |
|                      |                                                       | Russia: Ulyanovsk Province        | [19,28]                                 |
|                      |                                                       | Russia: Novosibirsk Province      | <b>Kosheleva et al. (present study)</b> |
|                      |                                                       | Japan: Hokkaido                   | [34]                                    |
| 62                   | <i>Oomyzus incertus</i> (Ratzeburg, 1844)             | Slovakia                          | [25]                                    |
|                      |                                                       | Russia: Udmurtia Republic         | [21,22]                                 |
|                      |                                                       | Russia: Ulyanovsk Province        | [17,19,28]                              |
| 63                   | <i>Oomyzus sokolowskii</i> (Kurdjumov, 1912)          | Bulgaria                          | [30]                                    |
| 64                   | <i>Tetrastichus</i> sp.                               | Russia: Moscow Province           | [11,24]                                 |
| <b>ICHNEUMONIDAE</b> |                                                       |                                   |                                         |
| 65                   | Ichneumonidae sp.                                     | Bulgaria                          | [30]                                    |
| 66                   | <i>Eudelus simillimus</i> (Taschenberg, 1865)         | Slovakia                          | [25]                                    |
| <b>BRACONIDAE</b>    |                                                       |                                   |                                         |
| 67                   | Braconidae sp.                                        | Hungary                           | [29]                                    |
|                      |                                                       | Russia: Moscow Province           | [11,24]                                 |
| 68                   | <i>Colastes braconius</i> (Haliday, 1833)             | Bulgaria                          | [30]                                    |
|                      |                                                       | Slovakia                          | [25]                                    |
|                      |                                                       | Russia: Novosibirsk Province      | <b>Kosheleva et al. (present study)</b> |
| 69                   | <i>Dolichogenidea dilecta</i> (Haliday, 1834)         | Japan: Hokkaido                   | [9]                                     |
| 70                   | <i>Apanteles</i> sp.                                  | Hungary                           | [29]                                    |
|                      |                                                       | Russia: Udmurtia Republic         | [21]                                    |

| No.                      | Species                                            | Locality                                                                                                                                                                                        | Reference                                                      |
|--------------------------|----------------------------------------------------|-------------------------------------------------------------------------------------------------------------------------------------------------------------------------------------------------|----------------------------------------------------------------|
| 71                       | <i>Pholetesor circumscriptus</i> (Nees 1834)       | Russia: Ulyanovsk Province<br>Slovakia<br>Russia: Moscow Province<br>Russia: Nizhny Novgorod<br>Russia: Tatarstan Republic, Kazan<br>Russia: Yekaterinburg<br>Russia: Tyumen<br>Japan: Hokkaido | [15,17]<br>[25]<br>[23]<br>[23]<br>[23]<br>[23]<br>[23]<br>[9] |
| 72                       | <i>Pholetesor exiguum</i> (Haliday, 1834)          | Slovakia                                                                                                                                                                                        | [25]                                                           |
| 73                       | <i>Pholetesor nataliae</i> Belokobylskij, sp. nov. | Russia: Primorsky Territory                                                                                                                                                                     | <b>Kosheleva et al.<br/>(present study)</b>                    |
| 74                       | <i>Pholetesor</i> sp.                              | Japan: Hokkaido                                                                                                                                                                                 | [9]                                                            |
| <b>ENCYRTIDAE</b>        |                                                    |                                                                                                                                                                                                 |                                                                |
| 75                       | Encyrtidae sp.                                     | Russia: Moscow Province                                                                                                                                                                         | [23]                                                           |
| 76                       | <i>Holcothorax</i> sp.                             | Japan: Hokkaido                                                                                                                                                                                 | [9]                                                            |
| <b>PTEROMALIDAE</b>      |                                                    |                                                                                                                                                                                                 |                                                                |
| 77                       | Pteromalidae sp.                                   | Russia: Moscow Province<br>Russia: Ulyanovsk Province                                                                                                                                           | [23]<br>[17]                                                   |
| <b>TRICHOGRAMMATIDAE</b> |                                                    |                                                                                                                                                                                                 |                                                                |
| 78                       | Trichogrammatidae sp.                              | Russia: Moscow Province                                                                                                                                                                         | [11,24]                                                        |
| <b>PROCTOTRUPIDAE</b>    |                                                    |                                                                                                                                                                                                 |                                                                |
| 79                       | Proctotrupidae sp.                                 | Russia: Moscow Province                                                                                                                                                                         | [23]                                                           |
