# Supplementary material for: The Hymenopterous Parasitoids of the Lime Leaf Miner Phyllonorycter issikii (Kumata) (Lepidoptera: Gracillariidae) from Its Native and Invaded Regions in Asian Russia
Source: MDPI journal article supplement (doi:10.3390/d14090707), 2022-08-26
Supplement: s1 [file s1]

**The hymenopterous parasitoids of the lime leaf miner *Phyllonorycter issikii* (Kumata) (Lepidoptera: Gracillariidae) from its native and invaded regions in Asian Russia**

**AUTHORS:** Oksana V. Kosheleva, Sergey A. Belokobylskij, Natalia I. Kirichenko

**Table S1.** The specimens of *Phyllonorycter issikii* parasitoids involved into molecular genetic analysis and the related sequences borrowed from BOLD for comparison. For each specimen, Sample ID and process ID are provided linking the records in the BOLD database with the voucher specimen data.

| No.                                             | Sample ID | Species                       | Process ID  | Country/<br>Ocean | State/Province   | Collection<br>Date | Collectors    | GenBank<br>Accession |
|-------------------------------------------------|-----------|-------------------------------|-------------|-------------------|------------------|--------------------|---------------|----------------------|
| <b>Specimens sequenced in the present study</b> |           |                               |             |                   |                  |                    |               |                      |
| 1                                               | NK856     | <i>Achrysocharoides cilla</i> | HYMRU037-21 | Russia            | Primorskiy Terr. | 07.VII.2021        | N. Kirichenko | OP292580             |
| 2                                               | NK862     | <i>Achrysocharoides cilla</i> | HYMRU043-21 | Russia            | Primorskiy Terr. | 07.VII.2021        | N. Kirichenko | OP292582             |
| 3                                               | NK874     | <i>Achrysocharoides cilla</i> | HYMRU055-21 | Russia            | Primorskiy Terr. | 07.VII.2021        | N. Kirichenko | OP292625             |
| 4                                               | NK876     | <i>Achrysocharoides cilla</i> | HYMRU057-21 | Russia            | Primorskiy Terr. | 07.VII.2021        | N. Kirichenko | OP292602             |
| 5                                               | NK877     | <i>Achrysocharoides cilla</i> | HYMRU058-21 | Russia            | Primorskiy Terr. | 07.VII.2021        | N. Kirichenko | OP292605             |
| 6                                               | NK878     | <i>Achrysocharoides cilla</i> | HYMRU059-21 | Russia            | Primorskiy Terr. | 07.VII.2021        | N. Kirichenko | OP292618             |
| 7                                               | NK881     | <i>Achrysocharoides cilla</i> | HYMRU062-21 | Russia            | Primorskiy Terr. | 07.VII.2021        | N. Kirichenko | OP292575             |
| 8                                               | NK884     | <i>Achrysocharoides cilla</i> | HYMRU065-21 | Russia            | Primorskiy Terr. | 07.VII.2021        | N. Kirichenko | OP292631             |
| 9                                               | NK893     | <i>Achrysocharoides cilla</i> | HYMRU074-21 | Russia            | Primorskiy Terr. | 07.VII.2021        | N. Kirichenko | OP292608             |
| 10                                              | NK894     | <i>Achrysocharoides cilla</i> | HYMRU075-21 | Russia            | Primorskiy Terr. | 07.VII.2021        | N. Kirichenko | OP292585             |
| 11                                              | NK897     | <i>Achrysocharoides cilla</i> | HYMRU078-21 | Russia            | Primorskiy Terr. | 07.VII.2021        | N. Kirichenko | OP292573             |
| 12                                              | NK846     | <i>Chrysocharis laomedon</i>  | HYMRU027-21 | Russia            | Primorskiy Terr. | 07.VII.2021        | N. Kirichenko | OP292609             |
| 13                                              | NK850     | <i>Chrysocharis laomedon</i>  | HYMRU031-21 | Russia            | Primorskiy Terr. | 07.VII.2021        | N. Kirichenko | OP292597             |
| 14                                              | NK851     | <i>Chrysocharis laomedon</i>  | HYMRU032-21 | Russia            | Primorskiy Terr. | 07.VII.2021        | N. Kirichenko | OP292635             |
| 15                                              | NK861     | <i>Chrysocharis laomedon</i>  | HYMRU042-21 | Russia            | Primorskiy Terr. | 07.VII.2021        | N. Kirichenko | OP292615             |
| 16                                              | NK864     | <i>Chrysocharis laomedon</i>  | HYMRU045-21 | Russia            | Primorskiy Terr. | 07.VII.2021        | N. Kirichenko | OP292587             |

| No. | Sample ID | Species                             | Process ID  | Country/<br>Ocean | State/Province    | Collection<br>Date | Collectors    | GenBank<br>Accession |
|-----|-----------|-------------------------------------|-------------|-------------------|-------------------|--------------------|---------------|----------------------|
| 17  | NK869     | <i>Chrysocharis laomedon</i>        | HYMRU050-21 | Russia            | Primorskiy Terr.  | 07.VII.2021        | N. Kirichenko | OP292626             |
| 18  | NK870     | <i>Chrysocharis laomedon</i>        | HYMRU051-21 | Russia            | Primorskiy Terr.  | 07.VII.2021        | N. Kirichenko | OP292603             |
| 19  | NK871     | <i>Chrysocharis laomedon</i>        | HYMRU052-21 | Russia            | Primorskiy Terr.  | 07.VII.2021        | N. Kirichenko | OP292614             |
| 20  | NK872     | <i>Chrysocharis laomedon</i>        | HYMRU053-21 | Russia            | Primorskiy Terr.  | 07.VII.2021        | N. Kirichenko | OP292593             |
| 21  | NK883     | <i>Chrysocharis laomedon</i>        | HYMRU064-21 | Russia            | Primorskiy Terr.  | 07.VII.2021        | N. Kirichenko | OP292600             |
| 22  | NK887     | <i>Chrysocharis laomedon</i>        | HYMRU068-21 | Russia            | Primorskiy Terr.  | 07.VII.2021        | N. Kirichenko | OP292606             |
| 23  | NK890     | <i>Chrysocharis laomedon</i>        | HYMRU071-21 | Russia            | Primorskiy Terr.  | 07.VII.2021        | N. Kirichenko | OP292610             |
| 24  | NK891     | <i>Chrysocharis laomedon</i>        | HYMRU072-21 | Russia            | Primorskiy Terr.  | 07.VII.2021        | N. Kirichenko | OP292588             |
| 25  | NK892     | <i>Chrysocharis laomedon</i>        | HYMRU073-21 | Russia            | Primorskiy Terr.  | 07.VII.2021        | N. Kirichenko | OP292624             |
| 26  | NK895     | <i>Chrysocharis laomedon</i>        | HYMRU076-21 | Russia            | Primorskiy Terr.  | 07.VII.2021        | N. Kirichenko | OP292613             |
| 27  | NK905     | <i>Chrysocharis laomedon</i>        | HYMRU086-21 | Russia            | Novosibirsk Prov. | 02.VII.2021        | M. Ryazanova  | OP292590             |
| 28  | NK907     | <i>Chrysocharis laomedon</i>        | HYMRU088-21 | Russia            | Novosibirsk Prov. | 02.VII.2021        | M. Ryazanova  | OP292619             |
| 29  | NK910     | <i>Chrysocharis laomedon</i>        | HYMRU091-21 | Russia            | Novosibirsk Prov. | 02.VII.2021        | M. Ryazanova  | OP292601             |
| 30  | NK866     | <i>Cirrospilus ussuriensis</i>      | HYMRU047-21 | Russia            | Primorskiy Terr.  | 07.VII.2021        | N. Kirichenko | OP292592             |
| 31  | NK-20-30  | <i>Colastes braconius</i>           | GPRU030-21  | Russia            | Novosibirsk Prov. | 26.VI.2020         | N. Kirichenko | OP292617             |
| 32  | NK906     | <i>Elachertus fenestratus</i>       | HYMRU087-21 | Russia            | Novosibirsk Prov. | 02.VII.2021        | M. Ryazanova  | OP292622             |
| 33  | NK908     | <i>Elachertus fenestratus</i>       | HYMRU089-21 | Russia            | Novosibirsk Prov. | 02.VII.2021        | M. Ryazanova  | OP292577             |
| 34  | NK-20-28  | <i>Elachertus fenestratus</i>       | GPRU028-21  | Russia            | Novosibirsk Prov. | 26.VI.2020         | N. Kirichenko | OP292572             |
| 35  | NK859     | <i>Elachertus inunctus</i>          | HYMRU040-21 | Russia            | Primorskiy Terr.  | 07.VII.2021        | N. Kirichenko | OP292576             |
| 36  | NK852     | <i>Mischotetrastichus nadezhdae</i> | HYMRU033-21 | Russia            | Primorskiy Terr.  | 07.VII.2021        | N. Kirichenko | OP292633             |
| 37  | NK-20-2   | <i>Pediobius cassidae</i>           | GPRU002-21  | Russia            | Novosibirsk Prov. | 15.VII.2021        | N. Kirichenko | OP292632             |
| 38  | NK-20-4   | <i>Pholetesor nataliae</i>          | GPRU004-21  | Russia            | Primorskiy Terr.  | 15.VII.2021        | N. Kirichenko | OP292636             |
| 39  | NK854     | <i>Pholetesor nataliae</i>          | HYMRU035-21 | Russia            | Primorskiy Terr.  | 07.VII.2021        | N. Kirichenko | OP292591             |
| 40  | NK855     | <i>Pholetesor nataliae</i>          | HYMRU036-21 | Russia            | Primorskiy Terr.  | 07.VII.2021        | N. Kirichenko | OP292583             |
| 41  | NK860     | <i>Pholetesor nataliae</i>          | HYMRU041-21 | Russia            | Primorskiy Terr.  | 07.VII.2021        | N. Kirichenko | OP292599             |
| 42  | NK873     | <i>Pholetesor nataliae</i>          | HYMRU054-21 | Russia            | Primorskiy Terr.  | 07.VII.2021        | N. Kirichenko | OP292634             |
| 43  | NK880     | <i>Pholetesor nataliae</i>          | HYMRU061-21 | Russia            | Primorskiy Terr.  | 07.VII.2021        | N. Kirichenko | OP292640             |
| 44  | NK885     | <i>Pholetesor nataliae</i>          | HYMRU066-21 | Russia            | Primorskiy Terr.  | 07.VII.2021        | N. Kirichenko | OP292620             |

| No.                                 | Sample ID      | Species                          | Process ID   | Country/<br>Ocean | State/Province    | Collection<br>Date | Collectors                | GenBank<br>Accession |
|-------------------------------------|----------------|----------------------------------|--------------|-------------------|-------------------|--------------------|---------------------------|----------------------|
| 45                                  | NK888          | <i>Pholetesor nataliae</i>       | HYMRU069-21  | Russia            | Primorskiy Terr.  | 07.VII.2021        | N. Kirichenko             | OP292628             |
| 46                                  | NK889          | <i>Pholetesor nataliae</i>       | HYMRU070-21  | Russia            | Primorskiy Terr.  | 07.VII.2021        | N. Kirichenko             | OP292637             |
| 47                                  | NK898          | <i>Pholetesor nataliae</i>       | HYMRU079-21  | Russia            | Primorskiy Terr.  | 07.VII.2021        | N. Kirichenko             | OP292641             |
| 48                                  | NK-20-31       | <i>Pholetesor nataliae</i>       | GPRU031-21   | Russia            | Primorskiy Terr.  | 11.VII.2021        | N. Kirichenko             | OP292630             |
| 49                                  | NK858          | <i>Pleurotroppopsis japonica</i> | HYMRU039-21  | Russia            | Primorskiy Terr.  | 07.VII.2021        | N. Kirichenko             | OP292596             |
| 50                                  | NK-20-27       | <i>Pnigalio pectinicornis</i>    | GPRU027-21   | Russia            | Novosibirsk Prov. | 26.VII.2020        | N. Kirichenko             | OP292598             |
| 51                                  | NK904          | <i>Pnigalio soemius</i>          | HYMRU085-21  | Russia            | Novosibirsk Prov. | 02.VII.2021        | M. Ryazanova              | OP292571             |
| 52                                  | NK909          | <i>Pnigalio soemius</i>          | HYMRU090-21  | Russia            | Novosibirsk Prov. | 02.VII.2021        | M. Ryazanova              | OP292586             |
| 53                                  | NK845          | <i>Sympiesis gordius</i>         | HYMRU026-21  | Russia            | Primorskiy Terr.  | 07.VII.2021        | N. Kirichenko             | OP292595             |
| 54                                  | NK849          | <i>Sympiesis gordius</i>         | HYMRU030-21  | Russia            | Primorskiy Terr.  | 07.VII.2021        | N. Kirichenko             | OP292639             |
| 55                                  | NK853          | <i>Sympiesis gordius</i>         | HYMRU034-21  | Russia            | Primorskiy Terr.  | 07.VII.2021        | N. Kirichenko             | OP292584             |
| 56                                  | NK865          | <i>Sympiesis gordius</i>         | HYMRU046-21  | Russia            | Primorskiy Terr.  | 07.VII.2021        | N. Kirichenko             | OP292638             |
| 57                                  | NK875          | <i>Sympiesis gordius</i>         | HYMRU056-21  | Russia            | Primorskiy Terr.  | 07.VII.2021        | N. Kirichenko             | OP292578             |
| 58                                  | NK857          | <i>Sympiesis laevifrons</i>      | HYMRU038-21  | Russia            | Primorskiy Terr.  | 07.VII.2021        | N. Kirichenko             | OP292579             |
| 59                                  | NK863          | <i>Sympiesis laevifrons</i>      | HYMRU044-21  | Russia            | Primorskiy Terr.  | 07.VII.2021        | N. Kirichenko             | OP292594             |
| 60                                  | NK867          | <i>Sympiesis laevifrons</i>      | HYMRU048-21  | Russia            | Primorskiy Terr.  | 07.VII.2021        | N. Kirichenko             | OP292607             |
| 61                                  | NK868          | <i>Sympiesis laevifrons</i>      | HYMRU049-21  | Russia            | Primorskiy Terr.  | 07.VII.2021        | N. Kirichenko             | OP292623             |
| 62                                  | NK879          | <i>Sympiesis laevifrons</i>      | HYMRU060-21  | Russia            | Primorskiy Terr.  | 07.VII.2021        | N. Kirichenko             | OP292627             |
| 63                                  | NK882          | <i>Sympiesis laevifrons</i>      | HYMRU063-21  | Russia            | Primorskiy Terr.  | 07.VII.2021        | N. Kirichenko             | OP292589             |
| 64                                  | NK886          | <i>Sympiesis laevifrons</i>      | HYMRU067-21  | Russia            | Primorskiy Terr.  | 07.VII.2021        | N. Kirichenko             | OP292612             |
| <b>Sequences borrowed from BOLD</b> |                |                                  |              |                   |                   |                    |                           |                      |
| 65                                  | CLV3908        | <i>Achrysocharoides cilla</i>    | PEDIO149-08  | England           | Ascot             | n/a                | C. Lopez-Vaamonde         | OP292581             |
| 66                                  | LMPAR032-16    | <i>Chrysocharis laomedon</i>     | LMPAR032-16  | Finland           | n/a               | n/a                | M. Mutanen, P. Vaelimaeki | MZ630860             |
| 67                                  | HM365050       | <i>Euplectrus</i> sp. D2168      | GBMIN8895-12 | Italy             | n/a               | n/a                | n/a                       | HM365050             |
| 68                                  | BIOUG36817-D01 | <i>Pnigalio pectinicornis</i>    | GMBMR747-17  | Belarus           | Minsk             | n/a                | T. Lipinksaya             | OP292574             |

| No.             | Sample ID            | Species                              | Process ID   | Country/<br>Ocean | State/Province    | Collection<br>Date | Collectors                             | GenBank<br>Accession |
|-----------------|----------------------|--------------------------------------|--------------|-------------------|-------------------|--------------------|----------------------------------------|----------------------|
| 69              | BC-ZSM-HYM-24123-B07 | <i>Pnigalio soemius</i>              | AMTPB1729-15 | Germany           | Bavaria           | 5-20.VII.2014      | D. Doczkal,<br>S. Schmidt,<br>J. Voith | OP292629             |
| 70              | CLV5108              | <i>Sympiesis gordius</i>             | PEDIO161-08  | Japan             | Hokkaido          | n/a                | C. Lopez-<br>Vaamonde                  | OP292616             |
| 71              | ZMUO.026793          | <i>Colastes braconius</i>            | LMPAR003-16  | Finland           | Aland Islands     | 2015               | M. Mutanen,<br>P. Vaelimaeki           | MZ629242             |
| 72              | BC-ZSM-HYM-24125-B12 | <i>Pholetesor<br/>circumscriptus</i> | AMTPB1924-15 | Germany           | n/a               | n/a                | D. Doczkal,<br>S. Schmidt,<br>J. Voith | OP292604             |
| 73              | ZMUO.026945          | <i>Pholetesor<br/>circumscriptus</i> | LMPAR155-16  | Finland           | Aland Islands     | 2015               | M. Mutanen,<br>P. Vaelimaeki           | MZ632559             |
| 74              | ASGLE2-0277          | <i>Pholetesor</i> sp.                | ASGLE1512-10 | Canada            | Ontario           | 24-31.V.2010       | A. Smith                               | JN288749             |
| 75              | MG836447             | <i>Pediobius cassidae</i>            | GBAH27244-19 | China             | n/a               | n/a                | T.T. Shao                              | MG836447             |
| <b>Outgroup</b> |                      |                                      |              |                   |                   |                    |                                        |                      |
| 76              | NK249                | <i>Aulagromyza populi</i>            | ISSIK113-14  | Russia            | Krasnoyarsk Terr. | 05.VII.2012        | N. Kirichenko                          | OP292621             |
| 77              | NK261                | <i>Phytomyza</i> sp.                 | ISSIK125-14  | Russia            | Primorskiy Terr.  | 05.VIII.2011       | N. Kirichenko                          | OP292611             |
